# Supplementary material
Source: Springer Nature journal article supplement (https://mijn.bsl.nl/resource/supplementary/13047_2008_10_MOESM5_ESM.pdf/7108700)

**a. Heel**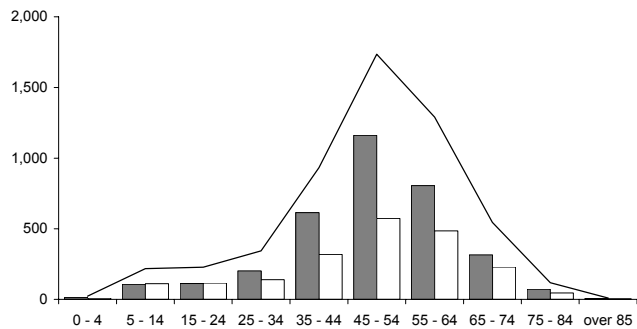**b. Rearfoot**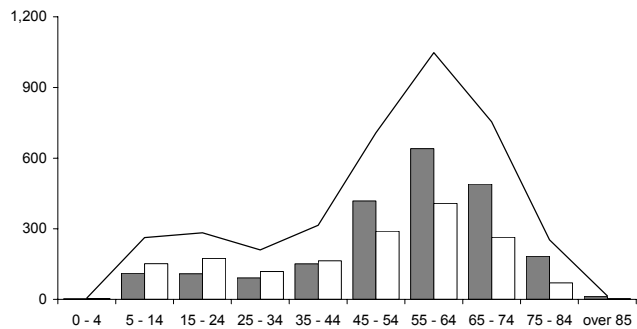**c. Lesser MPJs**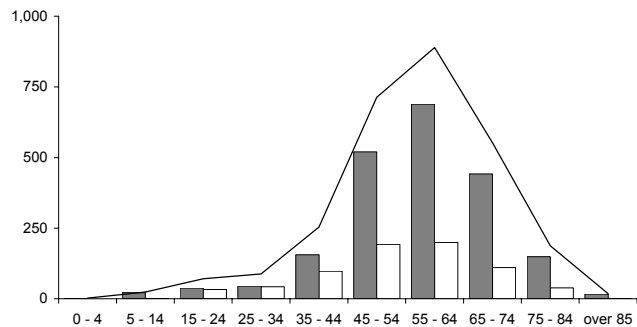**d. Tarsal coalition / congenital vertical talus**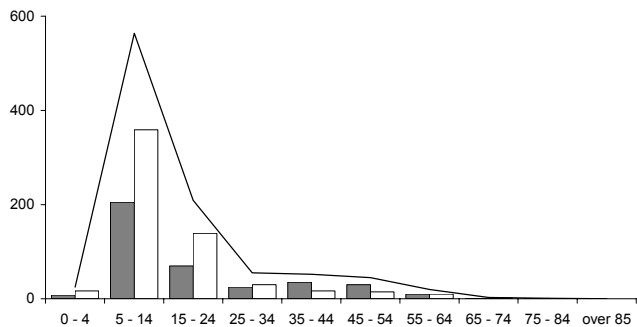

Supplement: MOESM5 [file 7108700]
